# Supplementary material for: Characterization of Amaranthus species: ability in nanoparticles fabrication and the antimicrobial activity against human pathogenic bacteria
Source: PeerJ. 2024 Feb 8;12:e16708. doi: 10.7717/peerj.16708 (PMC11075808; doi:10.7717/peerj.16708)
Supplement: Supplemental Information 2 [file peerj-12-16708-s002.xlsx]

## Sheet: Sheet1
Inhibition zone by mm for the effect of the all treatments on 4 types of bacteria
	AgNPs by A. blitum subsp. blitum var. blitum			AgNPs by A. graecizans L. subsp. graecizans			AgNPs by A. dubius			AgNPs by A. blitoides var. blitoides			AgNPs by A. viridis			Silver nitrate			Ampicillin
S. aureus	17	15	16	19	17	18	27	28	26	23	25	24	25	26	27	10	11	10	12	12	12
k. pneumoniae	19	17	18	21	19	20	20	19	20	25	26	24	20	21	20	8	9	9	13	13	13
P. aeruginosa	19	17	16	22	23	22	26	25	27	24	25	26	26	27	28	8	9	8	11	11	11
E. coli	21	20	19	21	19	20	26	27	25	36	37	38	28	29	27	8	9	8	13	13	13
